# Supplementary material
Source: PubMed Central journal article supplement (PMC4982765)

**Supplementary figure 1.** The effect of birth weight on the cortical folding. The significant areas (FDR<0.05) indicate the increase in sulcal depth in relation to larger birth weight.

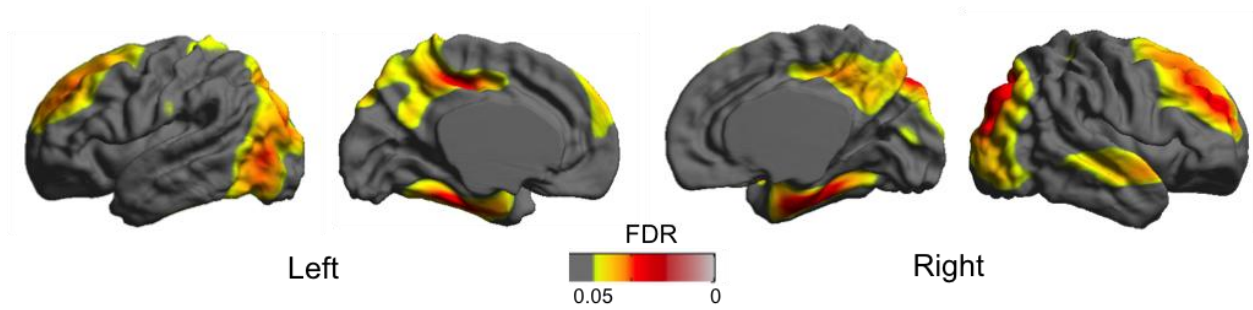

Supplement: NIHMS793680-supplement-Suppl.pdf [file NIHMS793680-supplement-Suppl.pdf]
